# Supplementary material for: Emerging SARS-CoV-2 Genotypes Show Different Replication Patterns in Human Pulmonary and Intestinal Epithelial Cells
Source: MDPI journal article supplement (doi:10.3390/v14010023), 2021-12-23
Supplement: s1 [file s1]

**Table S1.** List of isolated SARS-CoV-2 and their respective genotypes

|    | IHU-MI<br>Isolates | Lineage<br>(PANGO) | WHO Label | CDC<br>Classification       | Country first detected<br>(community)                 |
|----|--------------------|--------------------|-----------|-----------------------------|-------------------------------------------------------|
| 1  | 3                  |                    |           |                             |                                                       |
| 2  | 669                | B                  | –         | –                           | China                                                 |
| 3  | 845                |                    |           |                             |                                                       |
| 4  | 2122               |                    |           |                             |                                                       |
| 5  | 2123               | B.1.416            | –         | –                           | Senegal/Gambia                                        |
| 6  | 2178               |                    |           |                             |                                                       |
| 7  | 2137               | B.1.367            | –         | –                           | Europe (multiple<br>countries)                        |
| 8  | 2514               |                    |           |                             |                                                       |
| 9  | 3076               |                    |           |                             |                                                       |
| 10 | 3428               |                    |           |                             |                                                       |
| 11 | 3505               | B.1.1.7            | Alpha     | Variant of<br>Concern       | United Kingdom                                        |
| 12 | 3507               |                    |           |                             |                                                       |
| 13 | 3510               |                    |           |                             |                                                       |
| 14 | 3147               |                    |           |                             |                                                       |
| 15 | 3227               | B.1.351            | Beta      | Variant of<br>Concern       | South Africa                                          |
| 16 | 3228               |                    |           |                             |                                                       |
| 17 | 3242               |                    |           |                             |                                                       |
| 18 | 3396               |                    |           |                             |                                                       |
| 19 | 3630               |                    |           |                             |                                                       |
| 20 | 4654               | B.1.617.2          | Delta     | Variant of<br>Concern       | India                                                 |
| 21 | 4986               |                    |           |                             |                                                       |
| 22 | 4987               |                    |           |                             |                                                       |
| 23 | 3191               |                    |           |                             |                                                       |
| 24 | 3254               | P.1                | Gamma     | Variant of<br>Concern       | Brazil                                                |
| 25 | 3368               |                    |           |                             |                                                       |
| 26 | 2098               |                    |           |                             |                                                       |
| 27 | 2128               |                    |           |                             |                                                       |
| 28 | 2129               |                    |           |                             |                                                       |
| 29 | 2792               |                    |           |                             |                                                       |
| 30 | 2793               | B.1.160            | -         | -                           | Europe and United<br>Kingdom (multiple<br>countries)  |
| 31 | 3179               |                    |           |                             |                                                       |
| 32 | 3192               |                    |           |                             |                                                       |
| 33 | 3197               |                    |           |                             |                                                       |
| 34 | 3203               |                    |           |                             |                                                       |
| 35 | 2096               | B.1.525            | Eta       | Variants Being<br>Monitored | United Kingdom and<br>Nigeria (multiple<br>countries) |
| 36 | 3224               | A.27               | -         | -                           | Unclear                                               |
